# Supplementary material for: Lipoprotein(a) Cellular Uptake Ex Vivo and Hepatic Capture In Vivo Is Insensitive to PCSK9 Inhibition With Alirocumab
Source: PubMed Central journal article supplement — JACC Basic Transl Sci. 2020 May 6;5(6):549–57. doi: 10.1016/j.jacbts.2020.03.008 (PMC7315184; doi:10.1016/j.jacbts.2020.03.008), 2020-05-06

## SUPPLEMENT

### Lipoprotein (a) Cellular Uptake *ex-vivo* and Hepatic Capture *in-vivo* is

### Insensitive to PCSK9 Inhibition with Alirocumab

Chemello et al.

**Supplemental Table 1** - Analytical parameters used for each proteotypic peptide.

| Protein    | Species  | Peptide                                                                      | Fragment                     | Cone/collision (V) | MRM ( <i>m/z</i> ) |
|------------|----------|------------------------------------------------------------------------------|------------------------------|--------------------|--------------------|
| ApoB100    | Human    | ATGVLYDYVNK                                                                  | y <sub>6</sub> <sup>+</sup>  | 34/23              | 622.4 → 915.6      |
|            | Human IS | ATGVLYDYVN-[ <sup>13</sup> C <sub>6</sub> <sup>15</sup> N <sub>2</sub> ]K    | y <sub>6</sub> <sup>+</sup>  | 34/23              | 623.9 → 915.6      |
|            | Mouse    | DFSWEETGLK                                                                   | y <sub>7</sub> <sup>+</sup>  | 30/22              | 663.2 → 862.5      |
|            | Mouse IS | DFSWEETGL-[ <sup>13</sup> C <sub>6</sub> <sup>15</sup> N <sub>2</sub> ]K     | y <sub>7</sub> <sup>+</sup>  | 30/22              | 667.2 → 870.5      |
| Apo(a)     | Human    | LFLEPTQADIALLK                                                               | y <sub>10</sub> <sup>+</sup> | 57/27              | 786.9 → 1069.7     |
|            | Human SI | LFLEPTQADIALL-[ <sup>13</sup> C <sub>6</sub> <sup>15</sup> N <sub>2</sub> ]K | y <sub>10</sub> <sup>+</sup> | 57/27              | 790.8 → 1077.7     |
| Kringle IV | Human    | GTYSTTVTGR                                                                   | y <sub>7</sub> <sup>+</sup>  | 35/22              | 522.0 → 721.6      |
|            | Human SI | GTYSTTVTG-[ <sup>13</sup> C <sub>6</sub> <sup>15</sup> N <sub>4</sub> ]R     | y <sub>7</sub> <sup>+</sup>  | 35/22              | 527.2 → 731.4      |

**Supplemental Figure 1** - Lipoprotein distribution in the plasma of wild-type (black) and FRG mice (grey). Lipoproteins were separated from 40 μL of plasma by FPLC. Cholesterol concentrations (y-axis) were measured in the eluted fractions. LDL elute between fractions 15 and 25. HDL elute between fractions 25 and 35.

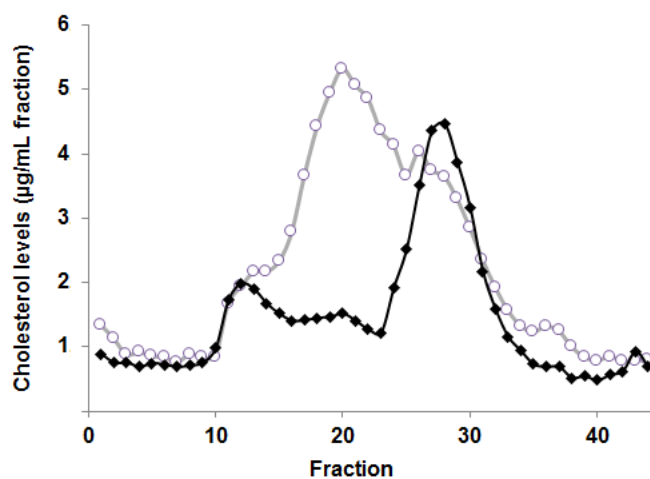

Supplement: mmc1.pdf [file mmc1.pdf]
